# Supplementary material for: Lower Risk of Acute Ischemic Stroke Following Transcatheter Aortic Valve Implantation in Female Patients with Chronic Inflammatory Diseases: A Retrospective Analysis of National Inpatient Sample
Source: Research Square preprint supplement (doi:10.21203/rs.3.rs-6232847/v1), 2025-04-02
Supplement: Supplementary file 1 [file 0c0f36a56066f1383e724de4.docx]

Table S1. Classification of Chronic Inflammatory Diseases

| Category | Conditions |
| --- | --- |
| 1. Rheumatoid Arthritis | Rheumatoid Arthritis |
| 2. Vasculitis | Giant Cell Vasculitis |
|  | Takayasu Arteritis |
|  | Granulomatosis with Polyangiitis |
|  | Eosinophilic Granulomatosis with Polyangiitis |
|  | Microscopic Polyangiitis |
| 3. Collagenosis/Connective Tissue Disorders | Systemic Sclerosis |
|  | Systemic Lupus Erythematosus |
|  | Sjögren Syndrome |
|  | Dermatomyositis |
|  | Polymyositis |
|  | Mixed Connective Tissue Disease |
|  | Undifferentiated Connective Tissue Disease |
| 4. Sarcoidosis | Sarcoidosis |
| 5. Polymyalgia Rheumatica | Polymyalgia Rheumatica |
| 6. Psoriasis Arthritis | Psoriatic Arthritis |
| 7. Ankylosing Spondylitis | Ankylosing Spondylitis |
| 8. Chronic Inflammatory Bowel Disease | Crohn Disease |
|  | Ulcerative Colitis |

Note: This classification represents an exhaustive list of chronic inflammatory diseases included in the study. This categorization provides a comprehensive overview of the inflammatory conditions analyzed in this research.

Table S2. International Classification of Diseases, 10th Revision Diagnostic and Procedure Codes for Study Variables

| Variable Category | ICD-10 Codes |
| --- | --- |
| Aortic Stenosis | I35.0 |
| Procedures |  |
| TAVI | 02RF3* |
| SAVR | 02RF0* |
| CABG | 0210*, 0211*, 0212*, 0213* |
| Mitral Valve Surgery | 02RG*, 02QG*, 02UG* |
| Pulmonary Valve Surgery | 02RH*, 02QH*, 02UH* |
| Tricuspid Valve Surgery | 02RJ*, 02QJ*, 02UJ* |
| Aortic Root Surgery | 02RX*, 02QX*, 02UX* |
| Comorbidities |  |
| Congestive heart failure | I09.9, I11.0, I13.0, I13.2, I25.5, I42.0, 142.5-I42.9, I43.x, I50.x, P29.0 |
| Smoking | F17.x, Z72.0, Z87.891 |
| Hypertension | I10.x-I13.x, I15.x |
| Dyslipidemia | E78.x |
| Diabetes Mellitus | E10.x-E14.x |
| Peripheral Vascular Disorders | I70.x, I71.x, I73.1, I73.8, I73.9, I77.1, I79.0, I79.2, K55.1, K55.8, K55.9, Z95.8, Z95.9 |
| Chronic Pulmonary Disease | I27.8, I27.9, J40.x-J47.x, J60.x-J67.x, J68.4, J70.1, J70.3 |
| Renal Failure | I12.0, I13.1, N18.x, N19.x, N25.0, Z49.0-Z49.2, Z94.0, Z99.2 |
| Obesity | E66.x |
| Medical History |  |
| Prior Stroke | Z86.73 |
| Prior MI | I25.2 |
| Prior PCI | Z95.5 |
| Prior CABG | Z95.1 |
| Medications |  |
| Corticosteroid use | Z79.52 |
| Chronic Inflammatory Diseases |  |
| Rheumatoid Arthritis | M05.x, M06.x |
| Giant Cell Arteritis | M31.5, M31.6 |
| Takayasu Arteritis | M31.4 |
| Eosinophilic Granulomatosis with Polyangiitis | M31.3, M31.30, M31.31 |
| Eosinophilic Granulomatosis | J82.83 |
| Microscopic Polyangiitis | M31.7 |
| Systemic Sclerosis | M34.x |
| Systemic Lupus Erythematosus | M32.x |
| Sjögren Syndrome | M35.0 |
| Dermatomyositis | M33.0, M33.1, M33.9 |
| Polymyositis | M33.2 |
| Mixed Connective Tissue Disease | M35.1 |
| Undifferentiated Connective Tissue Disease | M35.9 |
| Sarcoidosis | D86.x |
| Polymyalgia Rheumatica | M35.3 |
| Psoriatic Arthritis | L40.5 |
| Ankylosing Spondylitis | M45.x |
| Crohn disease | K50.x |
| Ulcerative Colitis | K51.x |

Note: * indicates that all subsequent digits are included.

Abbreviations: ICD-10, International Classification of Diseases, Tenth Revision; TAVI, transcatheter aortic valve implantation; SAVR, surgical aortic valve replacement; MI, myocardial infarction; PCI, percutaneous coronary intervention; CABG, coronary artery bypass grafting.

Table S3. Sex-Based Differences in Baseline Characteristics Among Patients with Chronic Inflammatory Disease Undergoing Transcatheter Aortic Valve Implantation Before and After PSM

| **Characteristics** | **Before Matching** | | | | **After Matching** | | | |
| --- | --- | --- | --- | --- | --- | --- | --- | --- |
|  | Male (n=1226) | Female (n=1939) | Std Diff | *P* Value | Female (n=979) | Male (n=979) | Std Diff | *P* Value |
| Demographics |  |  |  |  |  |  |  |  |
| Age, y | 78.40 ± 7.41 | 78.33 ± 8.07 | 0.01 | 0.813 | 78.40 ± 7.57 | 78.07 ± 8.65 | 0.04 | 0.365 |
| Race, % |  |  | 0.17 | <0.001* |  |  | 0.16 | 0.008* |
| White | 1102 (92.06) | 1645 (87.22) |  |  | 892 (91.11) | 861 (87.95) |  |  |
| Black | 33 (2.76) | 99 (5.25) |  |  | 29 (2.96) | 53 (5.41) |  |  |
| Hispanic | 31 (2.59) | 87 (4.61) |  |  | 29 (2.96) | 44 (4.49) |  |  |
| Other | 31 (2.59) | 55 (2.92) |  |  | 29 (2.96) | 21 (2.15) |  |  |
| Primary Payer, % |  |  | 0.23 | <0.001* |  |  | 0.19 | <0.001* |
| Medicare/Medicaid | 1078 (88.07) | 1776 (91.69) |  |  | 868 (88.66) | 869 (88.76) |  |  |
| Private Insurance | 7 (0.57) | 23 (1.19) |  |  | 7 (0.72) | 11 (1.12) |  |  |
| Self-pay | 94 (7.68) | 127 (6.56) |  |  | 72 (7.35) | 91 (9.30) |  |  |
| No charge/Other | 45 (3.68) | 11 (0.57) |  |  | 32 (3.27) | 8 (0.82) |  |  |
| Median Household Income Quartile, % |  |  | 0.12 | 0.014* |  |  | 0.10 | 0.206 |
| 0-25th | 189 (15.59) | 370 (19.27) |  |  | 162 (16.55) | 198 (20.22) |  |  |
| 26-50th | 313 (25.83) | 470 (24.48) |  |  | 245 (25.03) | 241 (24.62) |  |  |
| 51-75th | 370 (30.53) | 513 (26.72) |  |  | 286 (29.21) | 268 (27.37) |  |  |
| 76-100th | 340 (28.05) | 567 (29.53) |  |  | 286 (29.21) | 272 (27.78) |  |  |
| Hospital Characteristics |  |  |  |  |  |  |  |  |
| Hospital Region, % |  |  | 0.10 | 0.075 |  |  | 0.10 | 0.166 |
| Northeast | 341 (27.81) | 523 (26.97) |  |  | 249 (25.43) | 238 (24.31) |  |  |
| Midwest | 361 (29.45) | 642 (33.11) |  |  | 301 (30.75) | 345 (35.24) |  |  |
| South | 330 (26.92) | 457 (23.57) |  |  | 264 (26.97) | 234 (23.90) |  |  |
| West | 194 (15.82) | 317 (16.35) |  |  | 165 (16.85) | 162 (16.55) |  |  |
| Hospital Teaching Status, % |  |  | 0.06 | 0.273 |  |  | 0.05 | 0.572 |
| Rural | 19 (1.55) | 26 (1.34) |  |  | 15 (1.53) | 14 (1.43) |  |  |
| Urban Non-Teaching | 96 (7.83) | 183 (9.44) |  |  | 78 (7.97) | 91 (9.30) |  |  |
| Urban Teaching | 1111 (90.62) | 1730 (89.22) |  |  | 886 (90.50) | 874 (89.27) |  |  |
| Hospital Bed Size, % |  |  | 0.07 | 0.134 |  |  | 0.03 | 0.781 |
| Small | 97 (7.91) | 136 (7.01) |  |  | 78 (7.97) | 77 (7.87) |  |  |
| Medium | 306 (24.96) | 436 (22.49) |  |  | 201 (20.53) | 189 (19.31) |  |  |
| Large | 823 (67.13) | 1367 (70.50) |  |  | 700 (71.50) | 713 (72.83) |  |  |
| Clinical Characteristics |  |  |  |  |  |  |  |  |
| Current Smoking | 628 (51.22) | 574 (29.60) | 0.45 | <0.001* | 427 (43.62) | 420 (42.90) | 0.01 | 0.749 |
| Corticosteroid Use | 223 (18.19) | 276 (14.23) | 0.11 | 0.003* | 133 (13.59) | 151 (15.42) | 0.05 | 0.248 |
| Comorbidities, % |  |  |  |  |  |  |  |  |
| Congestive Heart Failure | 611 (49.84) | 974 (50.23) | 0.01 | 0.829 | 506 (51.69) | 488 (49.85) | 0.04 | 0.416 |
| Hypertension | 1041 (84.91) | 1701 (87.73) | 0.08 | 0.023* | 873 (89.17) | 847 (86.52) | 0.08 | 0.072 |
| Dyslipidemia | 920 (75.04) | 1269 (65.45) | 0.21 | <0.001* | 709 (72.42) | 701 (71.60) | 0.02 | 0.687 |
| Diabetes Mellitus | 421 (34.34) | 560 (28.88) | 0.12 | 0.001* | 331 (33.81) | 312 (31.87) | 0.04 | 0.361 |
| Prior Stroke | 146 (11.91) | 231 (11.91) | 0.00 | 0.997 | 113 (11.54) | 134 (13.69) | 0.06 | 0.153 |
| Prior MI | 174 (14.19) | 171 (8.82) | 0.17 | <0.001* | 120 (12.26) | 110 (11.24) | 0.03 | 0.483 |
| Prior PCI | 235 (19.17) | 237 (12.22) | 0.19 | <0.001* | 173 (17.67) | 163 (16.65) | 0.03 | 0.549 |
| Prior CABG | 193 (15.74) | 83 (4.28) | 0.39 | <0.001* | 81 (8.27) | 78 (7.97) | 0.01 | 0.804 |
| Peripheral Vascular Disease | 267 (21.78) | 363 (18.72) | 0.08 | 0.036* | 206 (21.04) | 197 (20.12) | 0.02 | 0.615 |
| Chronic Pulmonary Disease | 325 (26.51) | 595 (30.69) | 0.09 | 0.012* | 276 (28.19) | 283 (28.91) | 0.02 | 0.726 |
| Renal Failure | 404 (32.95) | 573 (29.55) | 0.07 | 0.044* | 327 (33.40) | 328 (33.50) | 0.00 | 0.962 |
| Obesity | 220 (17.94) | 432 (22.28) | 0.11 | 0.003* | 198 (20.22) | 204 (20.84) | 0.02 | 0.737 |
| Clinical Outcomes, % |  |  |  |  |  |  |  |  |
| AIS | 29 (2.37) | 26 (1.34) | 0.08 | 0.032* | 27 (2.76) | 12 (1.23) | 0.11 | 0.015* |
| In-Hospital Mortality | 9 (0.73) | 19 (0.98) | 0.03 | 0.472 | 8 (0.82) | 8 (0.82) | 0.00 | 1.000 |
| Length of Stay, d | 2.97 ± 3.50 | 3.37 ± 3.58 | 0.11 | <0.001* | 3.11 ± 3.66 | 3.16 ± 3.33 | 0.01 | 0.748 |
| Total Charges, $ | 202,904 ± 130,640 | 210,212 ± 122,825 | 0.06 | 0.047* | 206,438 ± 135,574 | 207,473 ± 116,943 | 0.01 | 0.857 |

Data are presented as mean ± SD or n (%).

Abbreviations: AIS, acute ischemic stroke; MI, myocardial infarction; PCI, percutaneous coronary intervention; CABG, coronary artery bypass grafting; SD, standard deviation; Std Diff, standardized difference; TAVI, transcatheter aortic valve implantation.

*Indicates statistically significant differences at P<0.05.

Table S4. Associations Between Sex and Clinical Outcomes in Patients with Chronic Inflammatory Disease Undergoing Transcatheter Aortic Valve Implantation after PSM

| Outcome | Male | Female | *P* Value |
| --- | --- | --- | --- |
| AIS |  |  |  |
| Non-adjusted OR (95% CI) | Ref. | 0.44 (0.22–0.87) | 0.018* |
| Adjusted Model OR (95% CI) | Ref. | 0.44 (0.22–0.87) | 0.018* |
| In-hospital Mortality |  |  |  |
| Non-adjusted OR (95% CI) | Ref. | 1.00 (0.37–2.68) | 1.000 |
| Adjusted Model OR (95% CI) | Ref. | 0.97 (0.36–2.61) | 0.957 |

Adjusted Model: Adjusted for Propensity Score

Abbreviations: AIS, acute ischemic stroke; PSM, propensity score matching; CI, confidence interval; OR, odds ratio.

*Indicates statistically significant differences at P<0.05.

Table S5. Sex-Based Differences in Baseline Characteristics among Patients with Arthritis Inflammatory Disease Undergoing Transcatheter Aortic Valve Implantation after PSM

| Characteristic | Male (n=657) | Female (n=1,035) | Std Diff | *P* Value | Male (n=523) | Female (n=523) | Std Diff | *P* Value |
| --- | --- | --- | --- | --- | --- | --- | --- | --- |
| **Demographic Characteristics** |  |  |  |  |  |  |  |  |
| Age, years | 77.95 ± 6.93 | 78.42 ± 7.85 | 0.06 | 0.210 | 77.93 ± 7.27 | 77.89 ± 8.16 | 0.01 | 0.933 |
| **Race, %** |  |  | 0.21 | <0.001* |  |  | 0.12 | 0.281 |
| White | 595 (92.11) | 860 (85.57) |  |  | 476 (91.01) | 469 (89.67) |  |  |
| Black | 19 (2.94) | 59 (5.87) |  |  | 16 (3.06) | 24 (4.59) |  |  |
| Hispanic | 17 (2.63) | 53 (5.27) |  |  | 16 (3.06) | 21 (4.02) |  |  |
| Other | 15 (2.32) | 33 (3.28) |  |  | 15 (2.87) | 9 (1.72) |  |  |
| **Socioeconomic Characteristics** |  |  |  |  |  |  |  |  |
| **Primary Payer, %** |  |  | 0.27 | <0.001* |  |  | 0.24 | 0.002* |
| Medicare/Medicaid | 582 (88.72) | 950 (91.88) |  |  | 467 (89.29) | 470 (89.87) |  |  |
| Private Insurance | 5 (0.76) | 14 (1.35) |  |  | 5 (0.96) | 4 (0.76) |  |  |
| Self-pay | 39 (5.95) | 65 (6.29) |  |  | 30 (5.74) | 45 (8.60) |  |  |
| No charge/Other | 30 (4.57) | 5 (0.48) |  |  | 21 (4.02) | 4 (0.76) |  |  |
| **Median Household Income Quartile, %** |  |  | 0.19 | 0.003* |  |  | 0.10 | 0.500 |
| 0–25th percentile | 104 (15.95) | 231 (22.56) |  |  | 92 (17.59) | 106 (20.27) |  |  |
| 26–50th percentile | 178 (27.30) | 261 (25.49) |  |  | 149 (28.49) | 137 (26.20) |  |  |
| 51–75th percentile | 208 (31.90) | 267 (26.07) |  |  | 143 (27.34) | 131 (25.05) |  |  |
| 76–100th percentile | 162 (24.85) | 265 (25.88) |  |  | 139 (26.58) | 149 (28.49) |  |  |
| **Hospital Characteristics** |  |  |  |  |  |  |  |  |
| **Hospital Region, %** |  |  | 0.17 | 0.012* |  |  | 0.08 | 0.675 |
| Northeast | 183 (27.85) | 227 (21.93) |  |  | 119 (22.75) | 124 (23.71) |  |  |
| Midwest | 205 (31.20) | 376 (36.33) |  |  | 175 (33.46) | 188 (35.95) |  |  |
| South | 169 (25.72) | 248 (23.96) |  |  | 144 (27.53) | 128 (24.47) |  |  |
| West | 100 (15.22) | 184 (17.78) |  |  | 85 (16.25) | 83 (15.87) |  |  |
| **Hospital Teaching Status, %** |  |  | 0.19 | <0.001* |  |  | 0.19 | 0.010* |
| Rural | 8 (1.22) | 16 (1.55) |  |  | 6 (1.15) | 9 (1.72) |  |  |
| Urban Non-Teaching | 36 (5.48) | 110 (10.63) |  |  | 31 (5.93) | 57 (10.90) |  |  |
| Urban Teaching | 613 (93.30) | 909 (87.83) |  |  | 486 (92.93) | 457 (87.38) |  |  |
| **Hospital Bed Size, %** |  |  | 0.14 | 0.017* |  |  | 0.02 | 0.940 |
| Small | 52 (7.91) | 83 (8.02) |  |  | 48 (9.18) | 47 (8.99) |  |  |
| Medium | 170 (25.88) | 207 (20.00) |  |  | 101 (19.31) | 97 (18.55) |  |  |
| Large | 435 (66.21) | 745 (71.98) |  |  | 374 (71.51) | 379 (72.47) |  |  |
| **Clinical Characteristics** |  |  |  |  |  |  |  |  |
| Current Smoking | 356 (54.19) | 338 (32.66) | 0.44 | <0.001* | 238 (45.51) | 228 (43.59) | 0.04 | 0.534 |
| Corticosteroid Use | 126 (19.18) | 134 (12.95) | 0.17 | <0.001* | 63 (12.05) | 81 (15.49) | 0.10 | 0.106 |
| **Comorbidities** |  |  |  |  |  |  |  |  |
| Congestive Heart Failure | 331 (50.38) | 522 (50.43) | 0.00 | 0.983 | 284 (54.30) | 257 (49.14) | 0.10 | 0.095 |
| Hypertension | 540 (82.19) | 907 (87.63) | 0.15 | 0.002* | 468 (89.48) | 443 (84.70) | 0.14 | 0.021* |
| Dyslipidemia | 502 (76.41) | 698 (67.44) | 0.20 | <0.001* | 381 (72.85) | 381 (72.85) | 0.00 | 1.000 |
| Diabetes Mellitus | 235 (35.77) | 329 (31.79) | 0.08 | 0.090 | 196 (37.48) | 189 (36.14) | 0.03 | 0.654 |
| Prior Stroke | 78 (11.87) | 114 (11.01) | 0.03 | 0.588 | 65 (12.43) | 54 (10.33) | 0.07 | 0.284 |
| Prior MI | 94 (14.31) | 108 (10.43) | 0.12 | 0.017* | 70 (13.38) | 55 (10.52) | 0.09 | 0.153 |
| Prior PCI | 117 (17.81) | 130 (12.56) | 0.15 | 0.003* | 90 (17.21) | 85 (16.25) | 0.03 | 0.679 |
| Prior CABG | 100 (15.22) | 52 (5.02) | 0.34 | <0.001* | 54 (10.33) | 46 (8.80) | 0.05 | 0.400 |
| Peripheral Vascular Disease | 151 (22.98) | 184 (17.78) | 0.13 | 0.009* | 113 (21.61) | 112 (21.41) | 0.00 | 0.940 |
| Chronic Pulmonary Disease | 190 (28.92) | 340 (32.85) | 0.09 | 0.089 | 155 (29.64) | 170 (32.50) | 0.06 | 0.316 |
| Renal Failure | 189 (28.77) | 313 (30.24) | 0.03 | 0.518 | 161 (30.78) | 153 (29.25) | 0.03 | 0.589 |
| Obesity | 127 (19.33) | 269 (25.99) | 0.16 | 0.002* | 114 (21.80) | 118 (22.56) | 0.02 | 0.766 |
| **Clinical Outcomes** |  |  |  |  |  |  |  |  |
| AIS | 16 (2.44) | 10 (0.97) | 0.11 | 0.017* | 15 (2.87) | 5 (0.96) | 0.14 | 0.024* |
| In-Hospital Mortality | 2 (0.30) | 11 (1.06) | 0.09 | 0.082 | 2 (0.38) | 7 (1.34) | 0.10 | 0.094 |
| Length of Stay, days | 2.85 ± 3.34 | 3.29 ± 3.65 | 0.13 | 0.013* | 3.05 ± 3.53 | 3.11 ± 3.44 | 0.02 | 0.788 |
| Total Charges, $ | 198,508.58 ± 111,514.21 | 211,926.26 ± 125,413.99 | 0.11 | 0.026* | 201,531.39 ± 115,209.46 | 209,314.80 ± 120,459.41 | 0.07 | 0.287 |

Data are presented as mean ± SD or n (%).

Abbreviations: AIS, acute ischemic stroke; MI, myocardial infarction; PCI, percutaneous coronary intervention; CABG, coronary artery bypass grafting; SD, standard deviation; Std Diff, standardized difference; TAVI, transcatheter aortic valve implantation.

*Indicates statistically significant differences at P<0.05.

Table S6. Association Between Sex and Clinical Outcomes in Patients with Inflammatory Arthritis Disease Undergoing Transcatheter Aortic Valve Implantation after PSM

| Outcome | Male | Female | *P* Value |
| --- | --- | --- | --- |
| AIS |  |  |  |
| Non-adjusted OR (95% CI) | Ref. | 0.33 (0.12–0.91) | 0.032* |
| Adjusted Model OR (95% CI) | Ref. | 0.33 (0.12–0.90) | 0.031* |
| In-hospital Mortality |  |  |  |
| Non-adjusted OR (95% CI) | Ref. | 3.53 (0.73–17.09) | 0.117 |
| Adjusted Model OR (95% CI) | Ref. | 3.34 (0.69–16.25) | 0.135 |

Adjusted Model: Adjusted for Propensity Score

Abbreviations: AIS, acute ischemic stroke; PSM, propensity score matching; CI, confidence interval; OR, odds ratio.

*Indicates statistically significant differences at P<0.05.
